# Supplementary material for: Readily producing a Silly Putty-like hydrogel with good self-healing, conductive and photothermal conversion properties based on dynamic coordinate bonds and hydrogen bonds
Source: Royal Society of Chemistry journal article supplement (doi:10.1039/d0tc00814a), 2020-01-01
Supplement: d0tc00814a1.pdf [file d0tc00814a1.pdf]

## Supporting Information

# Readily Producing the High Self-Healing, Conductive and Photothermal Conversion Silly Putty-like Hydrogel Based on Dynamic Coordinate Bonds and Hydrogen Bonds

*Shuai Zhang, Bowen Xu, Xinyi Lu, Lei Wang, Yunlong Li, Ning Ma, Hao Wei, Xinyue Zhang\* and Guojun Wang\**

S. Zhang, B. Xu, X. Lu, L. Wang, Y. Li, Prof. N. Ma, Prof. H. Wei, Dr. X. Zhang, Prof. G. Wang

Key Laboratory of Superlight Material and Surface Technology of Ministry of Education, College of Material Science and Chemical Engineering, Harbin Engineering University, 145 Nantong Street, Harbin, 150001, China

E-mail: xinyue@hrbeu.edu.cn; wang5347@hrbeu.edu.cn

Keywords: Phytate polyvinyl alcohol, Polypyrrole, Silly Putty-like hydrogel, Self-healing, Photothermal conversion

### Table of content

1. Synthetic route of PPVA and ATR-FTIR spectra (**Figure S1-S2**).
2. The contents of each PPF<sub>e</sub> gel (**Table S1**).
3. XPS analysis of PPF<sub>e4</sub> gel (**Table S2, Figure S3**).
4. Strain sensing and self-healing of PPF<sub>e4</sub> gel (**Figure S4, Figure S5**).
5. Temperature sensing devices (**Figure S6**).
6. Internal dynamic bonds and self-healing mechanism of PPF<sub>e</sub> gel (**Scheme S1-S2**).

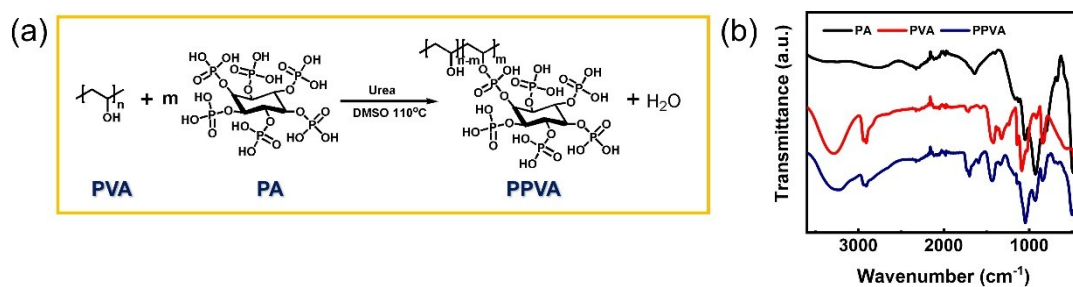

**Figure S1.** Synthetic route of PPVA (a), ATR-FTIR spectra of PA, PVA and PPVA.

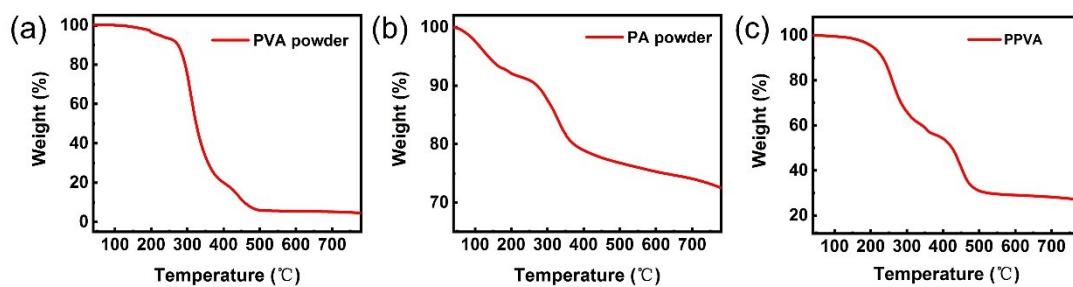

**Figure S2.** TG analysis of PVA (a), PA (b) and PPVA (c), respectively.

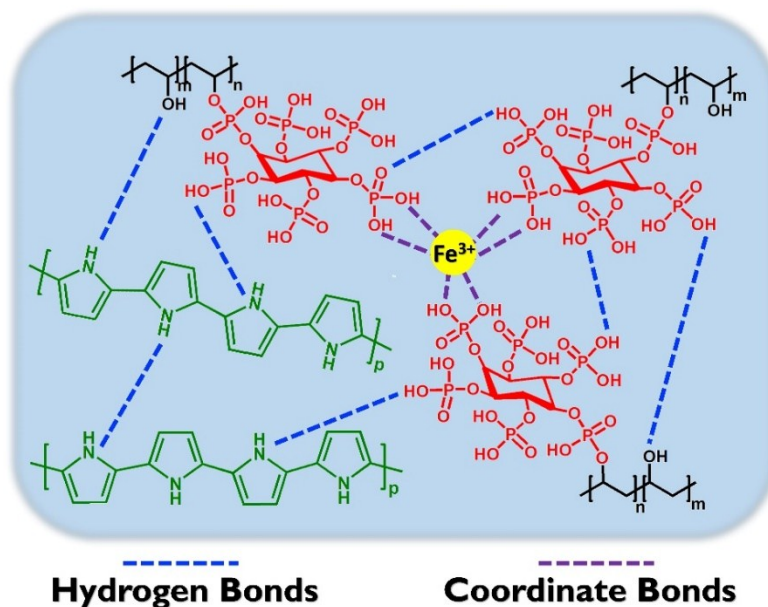

**Scheme S1.** The complex interactions between each composition inside the PPFc gel.

**Table S1** The samples of with different  $\text{Fe}^{3+}$  contents

| Samples             | 10 wt.% PPVA (mL) | $\text{Fe}^{3+}$ (0.4 mL) | Py ( $\mu\text{L}$ ) |
|---------------------|-------------------|---------------------------|----------------------|
| PPFe <sub>0.5</sub> | 1.0               | 0.5 mol/L                 | 20.0                 |
| PPFe <sub>1</sub>   | 1.0               | 1.0 mol/L                 | 20.0                 |
| PPFe <sub>2</sub>   | 1.0               | 2.0 mol/L                 | 20.0                 |
| PPFe <sub>4</sub>   | 1.0               | 4.0 mol/L                 | 20.0                 |

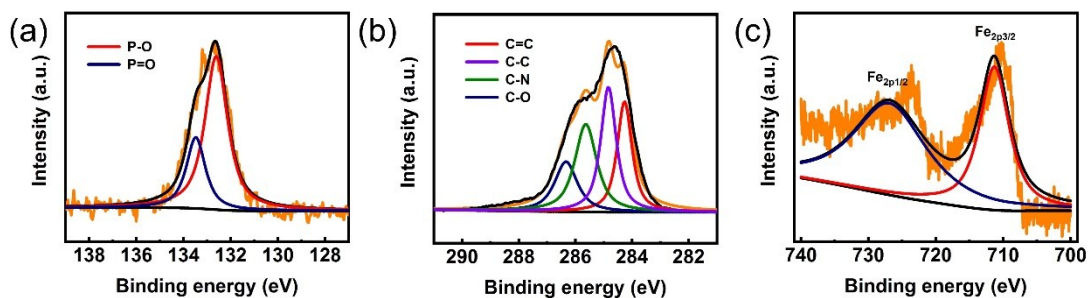

**Figure S3.** The high-resolution XPS spectra of P 2p (a), C 1s (b) and Fe 2p (c), respectively.

**Table S2** The content of elements by the XPS survey spectrum

| Elements | C    | O    | N   | P   | Fe  | others |
|----------|------|------|-----|-----|-----|--------|
| mol (%)  | 64.8 | 25.7 | 3.7 | 1.7 | 1.2 | 2.9    |

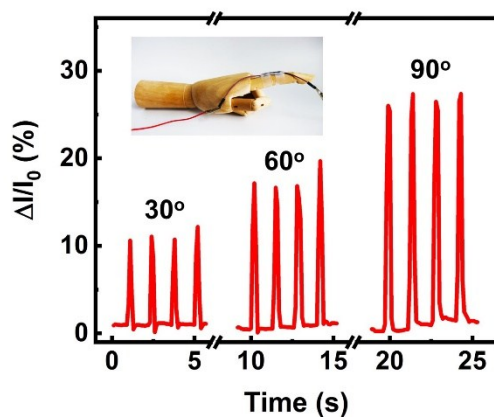

**Figure S4.** The strain response curves of the PPF<sub>e4</sub> gel attached on a toy index finger at different bending angles of 30°, 60° and 90°, respectively.

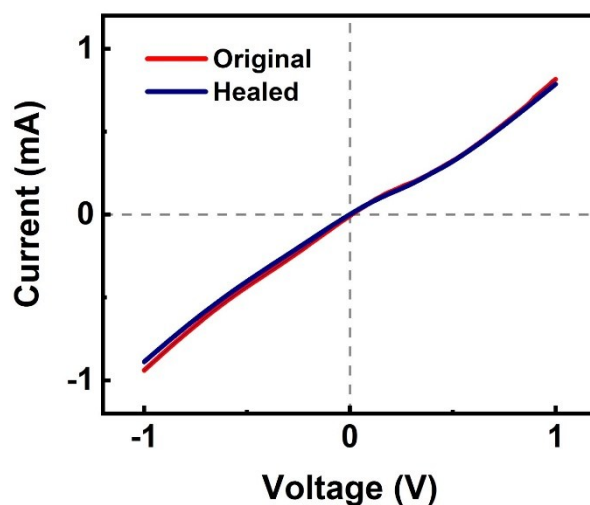

**Figure S5.** The linear  $I-V$  curves before and after self-healing of the PPF<sub>e4</sub> hydrogel.

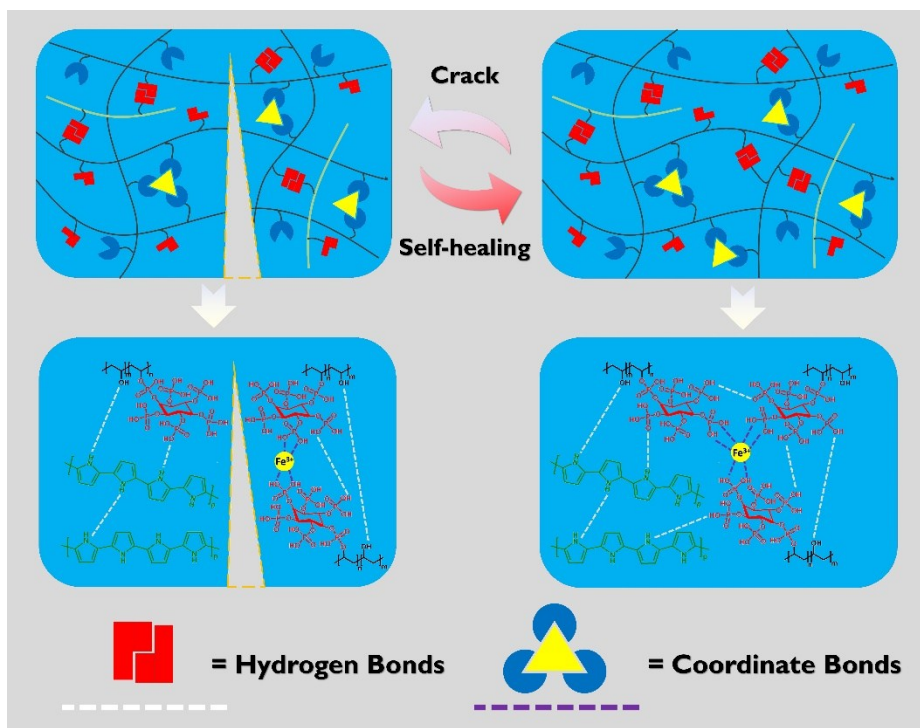

**Scheme S2.** The function of hydrogen bonds and coordinate bonds during the self-healing process.

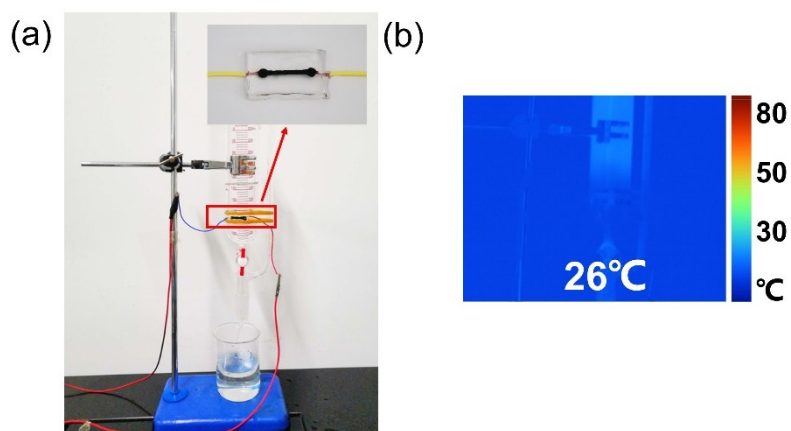

**Figure S6.** The optical images of temperature sensing device for hot water, inset as the PPF<sub>4</sub> gel-based chip (a). (b) The infrared thermal image of the water at room temperature.
